# Supplementary material
Source: PubMed Central journal article supplement (PMC2323096)
Supplement: bmj_39517.808160.BE_1.pdf [file bmj_39517.808160.BE_1.pdf]

- w1. Testini M, Piccinni G, Miniello S, Di Venere B, Lissidini G, Nicolardi V, et al. Treatment of chronic pilonidal sinus with local anaesthesia: A randomized trial of closed compared with open technique. *Colorectal Dis* 2001;3(6):427-430.
- w2. Sondanaa K, Andersen E, Søreide JA. Morbidity and short term results in a randomised trial of open compared with closed treatment of chronic pilonidal sinus. *Eur J Surg* 1992;158(6-7):351-355.
- w3. Sondanaa K, Nesvik I, Andersen E, Søreide JA. Recurrent pilonidal sinus after excision with closed or open treatment: final result of a randomised trial. *Eur J Surg* 1996;162(3):237-240.
- w4. Al-Hassan HK, Francis IM, Neglén P. Primary closure or secondary granulation after excision of pilonidal sinus? *Acta Chir Scand* 1990;156(10):695-698.
- w5. Fuzun M, Bakir H, Soylu M, Tansu T, Kamak E, Hamanciolu O. Which technique for treatment of pilonidal sinus--open or closed? *Dis Colon Rectum* 1994;37(11):1148-1150.
- w6. Gencosmanoglu R, Inceoglu R. Modified lay-open (Incision, Curettage, Partial lateral wall excision and Marsupialization) versus Total Excision with Primary Closure in the treatment of chronic sacrococcygeal pilonidal sinus. *Int J Colorectal Dis* 2005;20:415-422

- w7. Hameed KK. Outcome of surgery for chronic natal cleft pilonidal sinus: A randomized trial of open compared with closed technique. *Medical Forum Monthly* 2001;12(5):20- 23.
- w8. Khawaja HT, Bryan S, Weaver PC. Treatment of natal cleft sinus: a prospective clinical and economic evaluation. *BMJ* 1992;304(6837):1282-3.
- w9. Kronborg O, Christensen K, Zimmermann-Nielsen C. Chronic pilonidal disease: a randomized trial with a complete 3-year follow-up. *Br J Surg* 1985;72(4):303-4.
- w10. Mohamed HA, Kadry I, Adly S. Comparison between three therapeutic modalities for non-complicated pilonidal sinus disease. *J R Coll Surg Edinb* 2005;3(2):73-77.
- w11. Miocinovic M, Horzic M, Bunoza D. The treatment of pilonidal disease of the sacrococcygeal region by the method of limited excision and open wound healing. *Acta Med Croatica* 1999;54(1):27-31.
- w12. Rao M, Zawislak W, Gilliland R. A prospective randomised trial comparing two treatment modalities for chronic pilonidal sinus (ABSTRACT). *Int J Colorectal Dis* 2001;3(1 Suppl 1):Oral 102.
- w13. Fazelli MS, Adel MG, Abaschi AH. Comparison of Outcomes in Z-plasty and delayed healing by secondary intention of the wound after the excision of sacral pilonidal sinus: results of a randomised, clinical trial. *Dis Colon Rectum* 2006;49:1831-1836.
- w14. Abu Galala KH, Salam IM, Abu Samaan KR, El Ashaal YI, Chandran VP, Sabastian M, et al. Treatment of pilonidal sinus by primary closure with a transposed

rhomboid flap compared with deep suturing: a prospective randomised clinical trial. *Eur J Surg* 1999;165(5):468-472.

w15. Ertan T, Koc M, Gocmen E, Aslar AK, Keskek M, Kilic M. Does technique alter quality of life after pilonidal sinus surgery? *Am J Surg* 2005;190(3):388-392.

w16. Berkem H, Topaloglu S, Ozel H, Avsar FM, Yildiz Y, Yuksel BC, et al. V-Y advancement flap closures for complicated pilonidal sinus disease. *Int J Colorectal Dis* 2005;20(4):343-348.

w17. Akca T, Colak T, Ustunsoy B, Kanik A, Aydin S. Randomized clinical trial comparing primary closure with the Limberg flap in the treatment of primary sacrococcygeal pilonidal disease. *Br J Surg* 2005;92(9):1081-1084.

w18. Wright DM, Anderson JH, Molloy RG. A randomised trial of the Bascom procedure vs. primary closure for pilonidal sinus. *Colorectal Dis* 2001;3(1 Suppl 1); Poster 185.

w19. Cihan A. Superiority of asymmetric modified Limberg flap for surgical treatment of pilonidal disease. *Dis Colon Rectum* 2006;49:244.
